# Supplementary material
Source: Springer Nature journal article supplement (https://www.springermedizin.de/resource/supplementary/12891_2012_1589_MOESM10_ESM.pdf/9508526)
Supplement: MOESM10 [file 9508526]

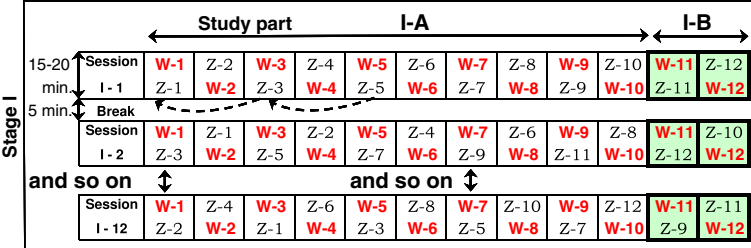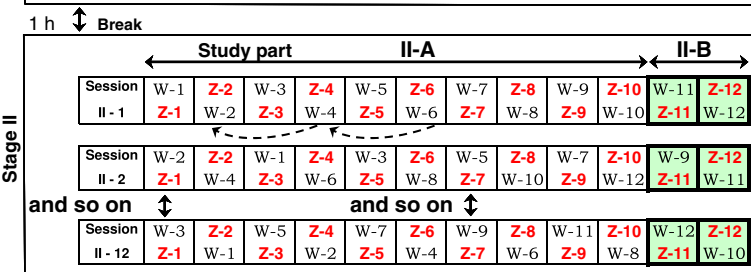

Stations where individual sets of 6 try-angles were used. Evaluation of MCP, PIP, & DIP joints of the left ring finger in 2 positions (1 for imitated flexion and 1 for extension; each measured with 2 instruments in 2 trials; angles, i.e. sub-positions, varied across subjects)

Stations where shared sets of 12 try-angles were used. Evaluation of PIP joint of the left ring finger in 2 positions (6 angles, i.e. sub-positions, for imitated flexion and 6 for extension; each measured with 2 instruments in 1 trial only; angles the same for all subjects)

Black font subject's ID      Red font rater's ID (permanent position)

← - - - Direction of subjects' movement for the next measurement session
